# Supplementary material for: Enhanced Li–S battery performance based on solution-impregnation-assisted sulfur/mesoporous carbon cathodes and a carbon-coated separator
Source: Royal Society of Chemistry journal article supplement (doi:10.1039/c7ta01161j), 2017-01-01
Supplement: c7ta01161j1.pdf [file c7ta01161j1.pdf]

## Enhanced Li-S Battery Performance Based on Solution-Impregnation-Assisted Sulfur/Mesoporous Carbon Cathodes and a Carbon-Coated Separator

Changil Oh, Naeun Yoon, Jaeho Choi, Yeseul Choi, Seonghyeon Ahn, and Jung Kyoo Lee\*

*<sup>a</sup>Department of Chemical Engineering, Dong-A University, Busan 49315, Republic of Korea*

### Supporting Information

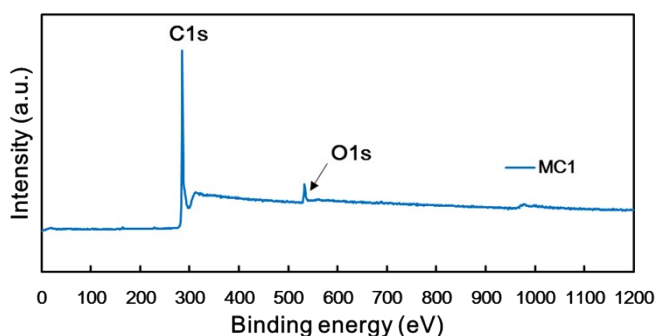

**Figure S1.** XPS survey spectrum of MC1.

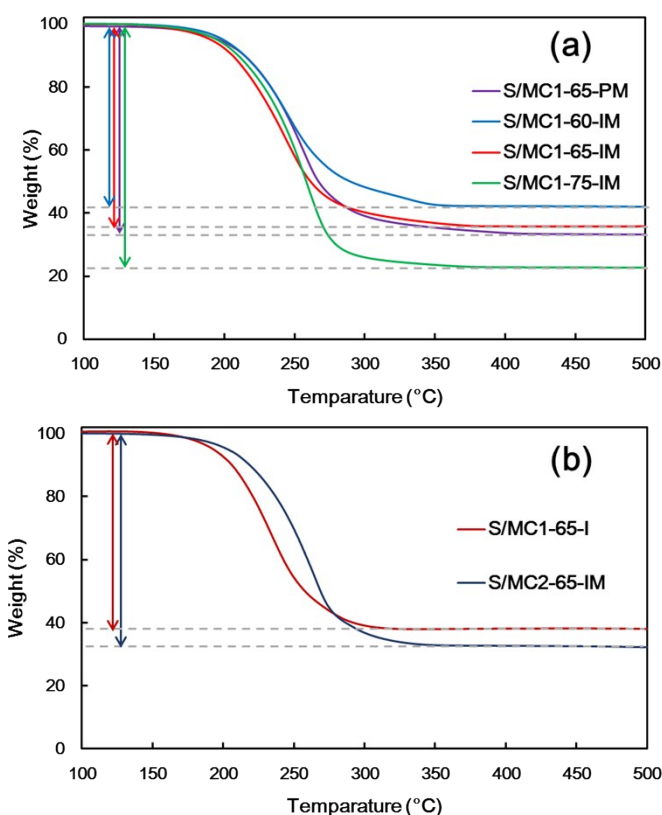

**Figure S2.** TGA profiles of (a) S/MC1s and (b) S/MC1-65-I (by impregnation only) and S/MC2-65-IM.

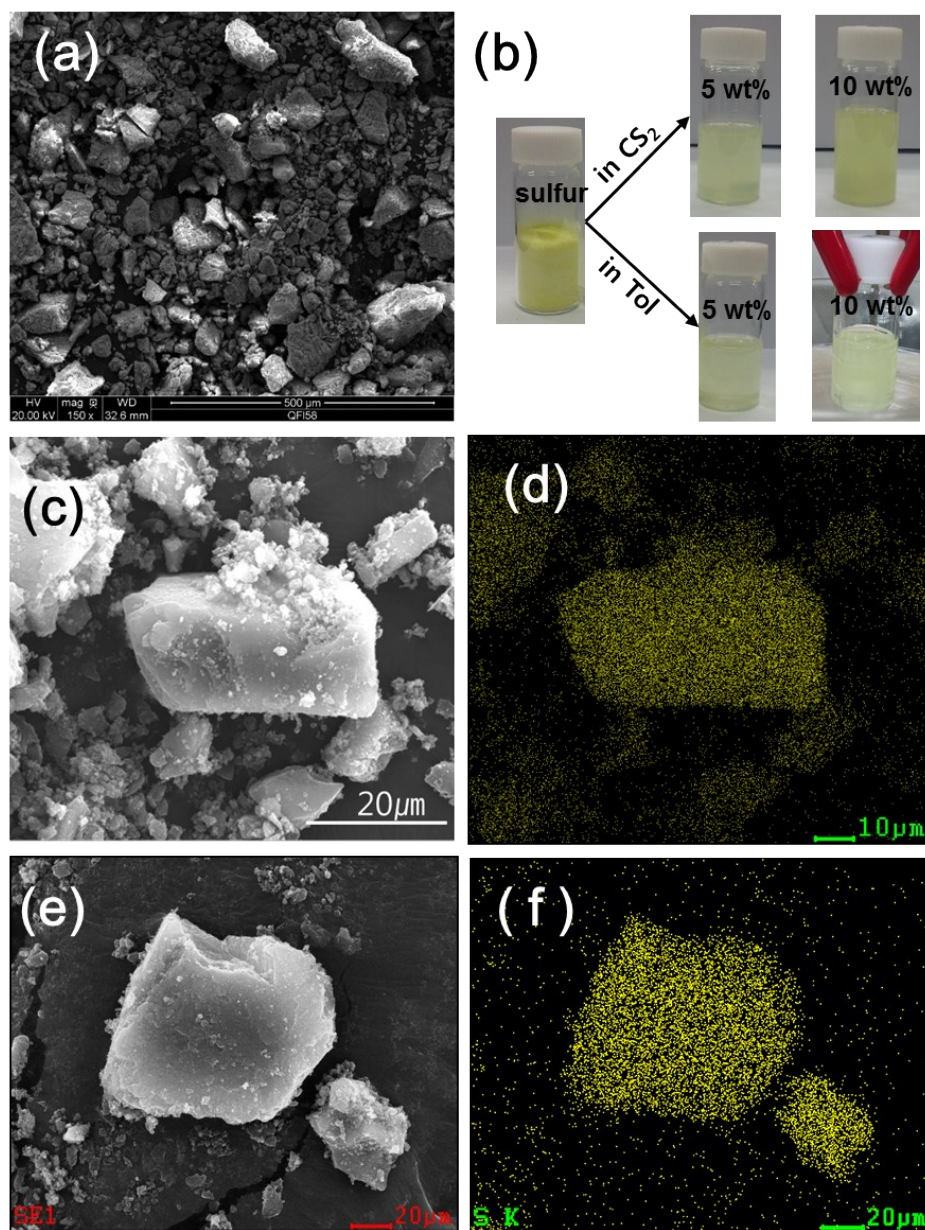

**Figure S3.** (a) SEM image of elemental sulfur powder, (b) photographs of elemental sulfur powder and sulfur dissolved in CS<sub>2</sub> at 5 wt% and 10 wt% at room temperature, and sulfur dissolved in toluene at 5 wt% and 10 wt% at 80 °C, (c) SEM image of S/MC1-65-PM and (d) EDS sulfur mapping of the image in (c), (e) SEM image of S/MC1-65-IM and (f) EDS sulfur mapping of image in (e).

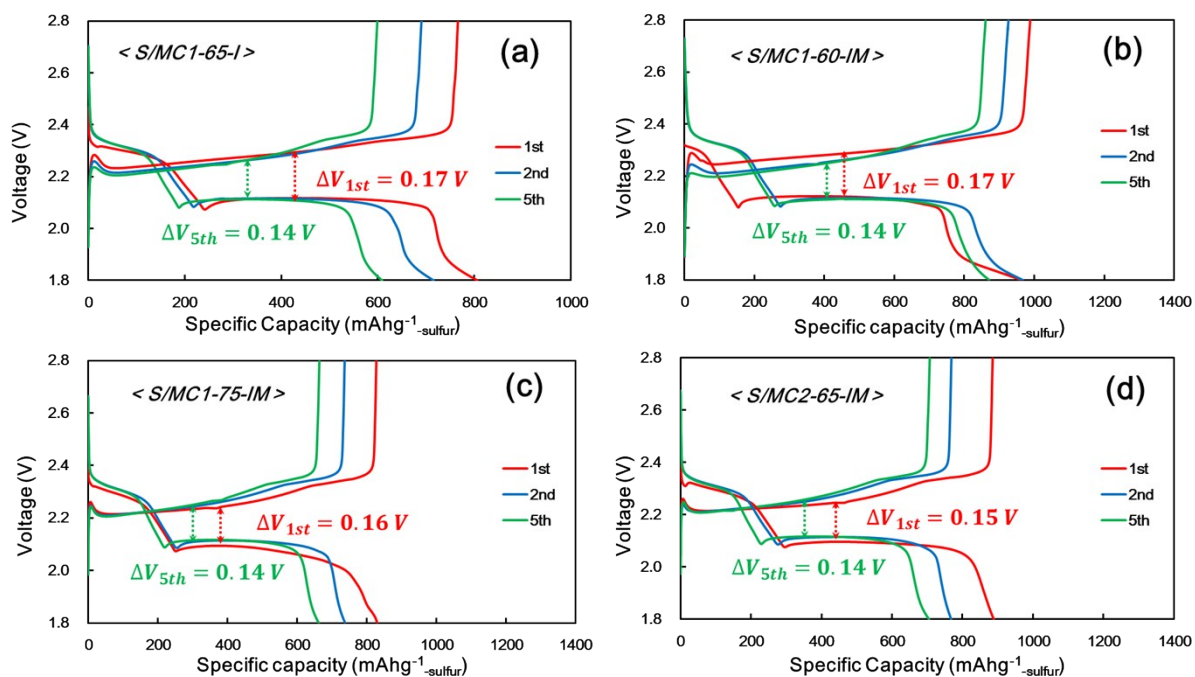

**Figure S4.** Voltage profiles of (a) S/MC1-65-I, (b) S/MC1-60-IM, (c) S/MC1-75-IM, and (d) S/MC2-65-IM.

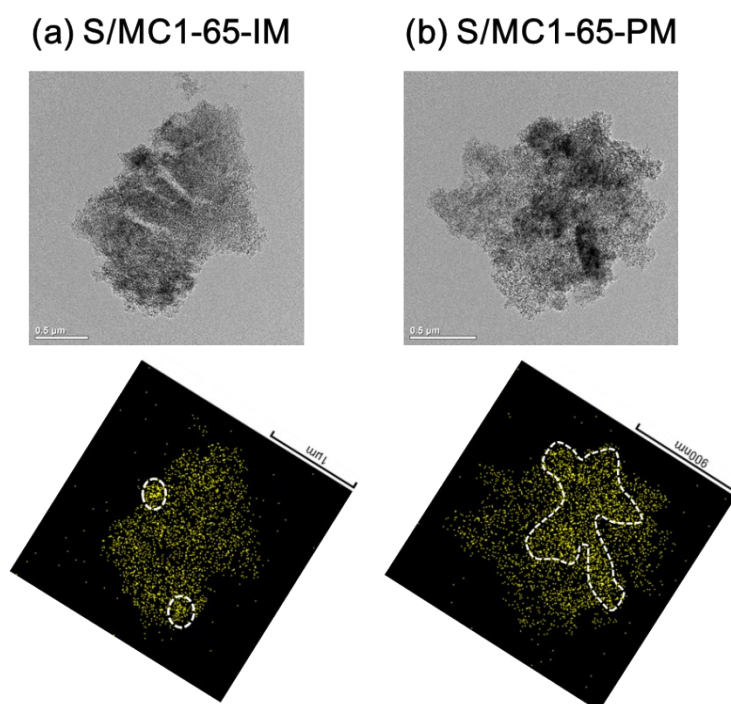

**Figure S5.** FE-TEM and sulfur mapping images of (a) S/MC1-65-IM and (b) S/MC1-65-PM showing the difference in internal sulfur dispersion on the samples. Dark-grey area in the FE-TEM image corresponds to the bright-yellow area of sulfur mapping image marked with dotted-white lines where local sulfur concentration is high, indicating that sulfur dispersion is much better in S/MC1-65-IM than in S/MC1-65-PM.

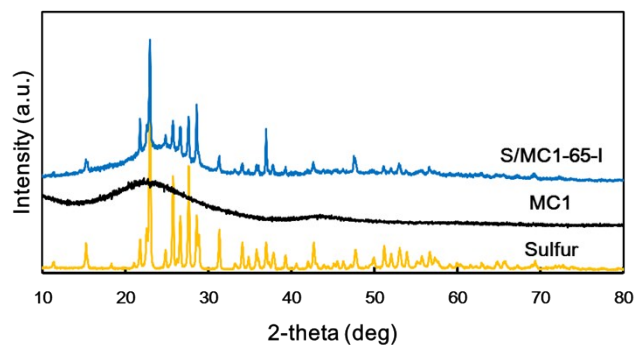

**Figure S6.** XRD patterns of S/MC1-65-I, MC1 and elemental sulfur.

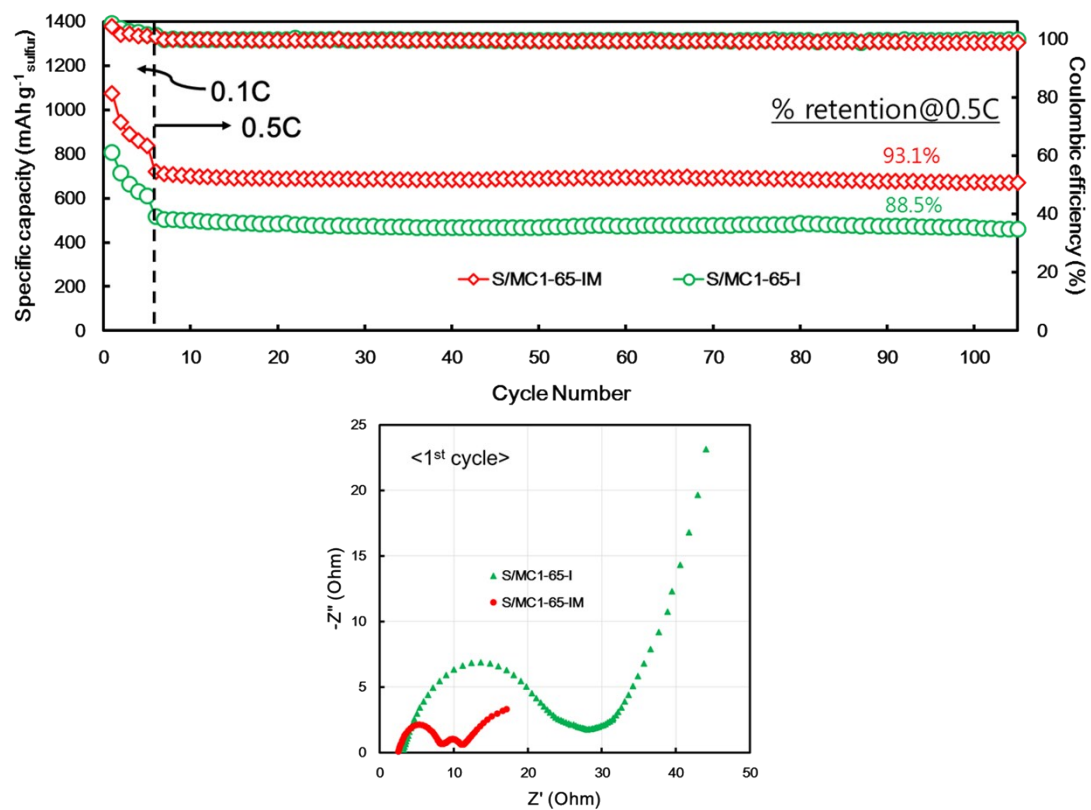

**Figure S7.** Cycling performances (top) and Nyquist plots (bottom, after 1<sup>st</sup> cycle) of S/MC1-65-I and S/MC1-65-IM cells.

**Table S1.** Comparison of electrochemical performances of various approaches for S/C cathode system.

| Approach                                    | First discharge capacity | Current density <sup>a)</sup> | Sulfur loading |                     | Sulfur Utilization       | Cycle number | Retention | Ref.       |
|---------------------------------------------|--------------------------|-------------------------------|----------------|---------------------|--------------------------|--------------|-----------|------------|
|                                             | mAh g <sup>-1</sup>      | mA g <sup>-1</sup>            | Wt. %          | mg cm <sup>-2</sup> | %                        |              | %         |            |
| S/MC1-60-IM                                 | 970 (0.1 C)              | 0.5 C                         | 59.2           | 1.3                 | 57.9 (44.5) <sup>b</sup> | 300          | 88.4      | This study |
| S/MC1-65-IM                                 | 1075 (0.1 C)             | 0.5 C                         | 65.3           | 1.3                 | 64.2 (43.0)              | 300          | 81.5      | This study |
| S/MC1-65-IM(CCS)                            | 1280 (0.1 C)             | 0.5 C                         | 65.3           | 1.3                 | 76.4 (55.2)              | 300          | 81.0      | This study |
| S/MC1-65-IM(CCS)                            | 1172 (0.1 C)             | 0.5 C                         | 65.3           | 2.9                 | 70.0 (55.4)              | 100          | 91.1      | This study |
| Ordered mesoporous carbon                   | 1070                     | 1.0 C                         | 70             | n. a.               | 63.9                     | 100          | 65.4      | [1]        |
| Ordered mesoporous carbon                   | 1050                     | 1.0 C                         | 50             | 0.7~0.8             | 62.7                     | 100          | 57.3      | [2]        |
| Meso-/micro-porous carbon                   | 1037                     | 0.5 C                         | 60.6           | 1                   | 61.9                     | 200          | 80.7      | [3]        |
| Hollow carbon sphere                        | 835                      | 1.0 C                         | 61             | n. a.               | 49.9                     | 500          | 75.4      | [4]        |
| Hollow carbon sphere                        | 1040                     | 0.5C                          | 61             | n. a.               | 62.1                     | 100          | 89.8      | [4]        |
| Porous hollow carbon                        | 1071                     | 0.5 C                         | 70             | n. a.               | 63.9                     | 100          | 90.9      | [5]        |
| Porous hollow carbon                        | 920                      | 0.5 C                         | 70             | 2.0~2.5             | 54.9                     | 100          | 89.4      | [6]        |
| Hierarchical Vine-Tree-Like Carbon Nanotube | 844                      | 1.0 C                         | 60             | 1.0~1.5             | 50.4                     | 450          | 62.8      | [7]        |
| Double-layer templated graphene             | 1084                     | 1.0 C                         | 64             | 0.8~1.1             | 64.7                     | 200          | 73.8      | [8]        |
| Carbon coated separator                     | 970                      | 0.1 C                         | 60             | 1.5~2.0             | 57.9                     | 200          | 62.9      | [9]        |
| Carbon layer                                | 1337                     | 0.014 C                       | 45             | 8.5                 | 79.8                     | 20           | 82.3      | [10]       |
| Carbon layer                                | 1050                     | 0.33 C                        | 55             | 13.9                | 62.7                     | 100          | 70.6      | [11]       |

Note; 1.0 C = 1675 mA g<sup>-1</sup>, <sup>a)</sup> Current density for the measurement of capacity retention, <sup>b)</sup> Sulfur utilization at 0.5 C.

## References for Table S1.

- [1] J. Schuster, G. He, B. Mandlmeier, T. Yim, K. T. Lee, T. Bein, and L. F. Nazar, *Angew. Chem. Int. Ed.*, **2012**, *51*, 3591.
- [2] G. He, X. Ji, and L. F. Nazar, *Energy Environ. Sci.*, **2011**, *4*, 2878.
- [3] Z. Li, Y. Jiang, L. Yuan, Z. Yi, C. Wu, Y. Liu, P. Strasser, and Y. Huang, *ACS Nano*, **2014**, *8*, 9295.
- [4] F. Xu, Z. Tang, S. Huang, L. Chen, Y. Liang, W. Mai, H. Zhong, R. Fu, and D. Wu, *Nat. Commun.*, **2015**, *6*:7221 (doi: 10.1038/ncomms8221).
- [5] N. Jayaprakash, J. Shen, S. S. Moganty, A. Corona, and L. A. Archer, *Angew. Chem. Int. Ed.*, **2011**, *50*, 5904.
- [6] G. He, S. Evers, X. Liang, M. Cuisinier, A. Garsuch, and L. F. Nazar, *ACS Nano*, **2013**, *7*, 10920.
- [7] M.-Q. Zhao, H.-J. Peng, G.-L. Tian, Q. Zhang, J.-Q. Huang, X.-B. Cheng, C. Tang, and F. Wei, *Adv. Mater.*, **2014**, *26*, 7051.
- [8] M.-Q. Zhao, Q. Zhang, J.-Q. Huang, G.-L. Tian, J.-Q. Nie, H.-J. Peng, and F. Wei, *Nat. Commun.*, **2014**, *5*, 3410 (doi: 10.1038/ncomms4410).
- [9] H. B. Yao, K. Yan, W. Y. Li, G. Y. Li, G. Y. Zheng, D. S. Kong, Z. W. She, V. K. Narasimhan, Z. Liang and Y. Cui, *Energy Environ. Sci.*, **2014**, *7*, 3381.
- [10] S. S. Zhang, *Electrochem. Commun.*, **2013**, *31*, 10.
- [11] L. Qie, and A. Manthiram, *ACS Energy Lett.*, **2016**, *1*, 46.
